1 **Metaepigenomic analysis reveals the unexplored diversity of DNA methylation in an environmental**  
2 **prokaryotic community.**

3 Satoshi Hiraoka<sup>1,†,\*</sup>, Yusuke Okazaki<sup>2</sup>, Mizue Anda<sup>3</sup>, Atsushi Toyoda<sup>4</sup>, Shin-ichi Nakano<sup>2</sup>, Wataru Iwasaki<sup>1,3,5,\*</sup>

4

5 1 Department of Computational Biology and Medical Sciences, Graduate School of Frontier Sciences, The  
6 University of Tokyo, Kashiwa, Japan

7 2 Center for Ecological Research, Kyoto University, Otsu, Japan

8 3 Department of Biological Sciences, Graduate School of Science, The University of Tokyo, Tokyo, Japan

9 4 National Institute of Genetics, Mishima, Japan

10 5 Atmosphere and Ocean Research Institute, The University of Tokyo, Kashiwa, Japan

11

12 † Present Address: Research and Development Center for Marine Biosciences, Japan Agency for  
13 Marine-Earth Science and Technology (JAMSTEC), Yokosuka, Japan

14

15 Email: [hiraokas@jamstec.go.jp](mailto:hiraokas@jamstec.go.jp), [iwasaki@bs.s.u-tokyo.ac.jp](mailto:iwasaki@bs.s.u-tokyo.ac.jp)

16

17 **Abstract**

18 DNA methylation plays important roles in prokaryotes, such as in defense mechanisms against phage  
19 infection, and the corresponding genomic landscapes—prokaryotic epigenomes—have recently begun to be  
20 disclosed. However, our knowledge of prokaryote methylation systems has been severely limited to those of  
21 culturable prokaryotes, whereas environmental communities are in fact dominated by uncultured members  
22 that must harbor much more diverse DNA methyltransferases. Here, using single-molecule real-time and  
23 circular consensus sequencing techniques, we revealed the ‘metaepigenomes’ of an environmental prokaryotic  
24 community in the largest lake in Japan, Lake Biwa. A total of 19 draft genomes from phylogenetically diverse  
25 groups, most of which are yet to be cultured, were successfully reconstructed. The analysis of DNA chemical  
26 modifications identified 29 methylated motifs in those genomes, among which 14 motifs were novel.  
27 Furthermore, we searched for the methyltransferase genes responsible for the methylation of the detected  
28 novel motifs and confirmed their catalytic specificities via transformation experiments involving artificially  
29 synthesized genes. Finally, we found that genomes without DNA methylation tended to exhibit higher phage  
30 infection levels than those with methylation. In summary, this study proves that metaepigenomics is a  
31 powerful approach for revealing the vast unexplored variety of prokaryotic DNA methylation systems in  
32 nature.

33

## 34 Introduction

35 DNA methylation is a major class of epigenetic modification that is found in diverse prokaryotes, in  
36 addition to eukaryotes<sup>1</sup>. For example, prokaryotic DNA methylation by sequence-specific  
37 restriction-modification (RM) systems that protect host cells from invasion by phages or extracellular DNA  
38 has been well characterized and is utilized as a key tool in biotechnology<sup>2,3,4</sup>. In addition, recent studies have  
39 revealed that prokaryotic DNA methylation plays additional roles, performing various biological functions,  
40 including regulation of gene expression, mismatch DNA repair, and cell cycle functions<sup>5-9</sup>. Research interest  
41 in the diversity of prokaryotic methylation systems is therefore growing due to their importance in microbial  
42 physiology, genetics, evolution, and disease pathogenicity<sup>7,10</sup>. However, our knowledge of the diversity of  
43 prokaryotic methylation systems has been severely limited thus far because most studies must focus only on  
44 the rare prokaryotes that are cultivable in laboratories.

45 The recent development of single-molecule real-time (SMRT) sequencing technology provides us  
46 with another tool for observing DNA methylation. An array of DNA methylomes of cultivable prokaryotic  
47 strains, including N6-methyladenine (m6A), 5-methylcytosine (m5C), and N4-methylcytosine (m4C)  
48 modifications, have been revealed by this technology<sup>11-14</sup>. Despite its high rates of base-calling and  
49 methylation-detection errors per raw read<sup>15,16</sup>, SMRT sequencing technology can produce ultralong reads of  
50 up to 60 kb with few context-specific biases (*e.g.*, GC bias)<sup>17</sup>. This characteristic enables SMRT sequencing to  
51 achieve high accuracy by merging data from many erroneous raw reads originating from clonal DNA  
52 molecules, typically from cultivated prokaryotic populations<sup>18</sup>. Alternatively, in an approach referred to as  
53 circular consensus sequencing (CCS), a circular DNA library is prepared as a sequence template to allow the  
54 generation of a single ultralong raw read containing multiple sequences ('subreads') that correspond to the  
55 same stretch on the template<sup>19,20</sup>; therefore, a cultivated clonal population is not required to achieve high  
56 accuracy<sup>21</sup>. However, CCS has thus far been applied in only a few shotgun metagenomics studies<sup>22</sup> and, to the  
57 best of our knowledge, has not yet been applied to 'metaepigenomics' or direct methylome analysis of  
58 environmental microbial communities, which are usually constituted by uncultured prokaryotes.

59 Here, we applied CCS to shotgun metagenomic and metaepigenomic analyses of freshwater  
60 microbial communities in Lake Biwa, the largest lake in Japan, to reveal the genomic and epigenomic  
61 characteristics of the environmental microbial communities using the PacBio Sequel platform. Freshwater  
62 habitats are rich in phage-prokaryote interactions<sup>23-26</sup>, which are known to be closely related to prokaryotic  
63 DNA methylation. CCS analyses of the environmental microbial samples allowed reconstruction of draft  
64 genomes and the identification of their methylated motifs, at least 14 of which were novel. Furthermore, we

65 computationally predicted and experimentally confirmed four methyltransferases (MTases) responsible for the  
66 detected methylated motifs. Importantly, two of the four MTases were revealed to recognize novel motif  
67 sequences.

68

## 69 **Materials and methods**

### 70 **Sample collection**

71 Water samples were collected at a pelagic site (35°13'09.5"N 135°59'44.7"E) in Lake Biwa, Japan  
72 (Fig. S1a) on December 26, 2016. The sampling site was located approximately 3 km from the nearest shore  
73 and had a depth of 73 m. The lake has a permanently oxygenated hypolimnion and was thermally stratified  
74 during sampling (Fig. S1b). Water sampling into prewashed 5-L Niskin bottles was conducted at depths of 5  
75 m and 65 m, above and below the thermally stratified layer, respectively. The vertical profiles of temperature,  
76 dissolved oxygen concentrations, and chlorophyll *a* concentrations were measured using a conductivity,  
77 temperature, and depth probe *in situ*. Equipment that could come into direct contact with the water samples in  
78 the following steps was either sterilized by autoclaving or disinfected with a hypochlorous acid solution. The  
79 water samples were transferred to sterile bottles, kept cool in the dark, and immediately transported to the  
80 laboratory. Water samples with a total volume of approximately 30 L were prefiltered through 5- $\mu$ m  
81 membrane PC filters (Whatman). Microbial cells were collected using 0.22- $\mu$ m Sterivex filters (Millipore) and  
82 immediately stored at  $-20^{\circ}\text{C}$  in a refrigerator until analysis.

83

### 84 **DNA extraction and SMRT sequencing**

85 The microbial DNA captured on the Sterivex filters was retrieved using a PowerSoil DNA Isolation  
86 Kit (QIAGEN) according to the supplier's protocol with slight modifications. The filters were removed from  
87 the container, cut into 3-mm fragments, and directly suspended in the extraction solution from the kit for cell  
88 lysis. The bead-beating time was extended to 20 minutes to yield sufficient quantities of DNA for SMRT  
89 sequencing, with reference to Albertsen *et al.*<sup>27</sup> SMRT sequencing was conducted using a PacBio Sequel  
90 system (Pacific Biosciences) in two independent runs according to the manufacturer's standard protocols.  
91 SMRT libraries for CCS were prepared with a 4-kb insertion length, and two SMRT cells were used for each  
92 sample as technical replicates.

93

## 94 **Bioinformatic analysis of CCS reads**

95 Reads that contained at least three full-pass subreads were retained to generate consensus sequences  
96 (CCS reads) using the standard PacBio SMRT software package with the default settings. Only CCS reads  
97 with >97% average base-call accuracy were retained. For taxonomic assignment of the CCS reads, Kaiju<sup>28</sup> in  
98 *Greedy-5* mode with the NCBI NR database<sup>29</sup> and Kraken<sup>30</sup> with the default parameters and complete  
99 prokaryotic genomes from RefSeq<sup>31</sup> were used. CCS reads that potentially encoded 16S ribosomal RNA  
100 (rRNA) genes were extracted using SortMeRNA<sup>32</sup> with the default settings, and the 16S rRNA sequences  
101 were predicted by RNAmmer<sup>33</sup> with the default settings. The 16S rRNA sequences were taxonomically  
102 assigned using BLASTN<sup>34</sup> searches against the SILVA database release 128<sup>35</sup>, where the top-hit sequences  
103 with e-values  $\leq 1E-15$  were retrieved.

104 CCS reads were *de novo* assembled using Canu<sup>18</sup> with the *-pacbio-corrected* setting and Mira<sup>36</sup>  
105 with the settings for PacBio CCS reads, according to the provided instructions. After removal of the  
106 assembled contigs that were suggested to contain repeats, the contigs were binned into genomes using  
107 MetaBAT<sup>37</sup> based on genome coverage and tetra-nucleotide frequencies as genomic signatures, where the  
108 genome coverage was calculated by mapping the CCS reads to the binned genomes using BLASR<sup>38</sup> with the  
109 settings for PacBio CCS reads. The quality of all genomes was assessed using CheckM<sup>39</sup>, which estimates  
110 completeness and contaminations based on taxonomic collocation of prokaryotic marker genes with the  
111 default settings. Sequence extraction and taxonomic assignment of 16S rRNA genes in each genome bin were  
112 conducted using RNAmmer<sup>33</sup> with the default settings. Taxonomic assignment of the genome bins was based  
113 on the 16S rRNA genes if found or on the taxonomic groups most frequently estimated by CAT<sup>40</sup> otherwise  
114 (and Kaiju<sup>28</sup> if CAT did not provide an estimation).

115 Coding sequences (CDSs) in each genome bin were predicted using Prodigal<sup>41</sup> with the default  
116 settings. Functional annotations were achieved through GHOSTZ<sup>42</sup> searches against the eggNOG<sup>43</sup> and  
117 Swiss-Prot<sup>44</sup> databases, with a cut-off e-value  $\leq 1E-5$ , and HMMER<sup>45</sup> searches against the Pfam database<sup>46</sup>,  
118 with a cut-off e-value  $\leq 1E-5$ . A maximum-likelihood (ML) tree of the genome bins was constructed on the  
119 basis of the set of 400 conserved prokaryotic marker genes using PhyloPhlAn<sup>47</sup> with the default settings.  
120 Prophages were predicted using PHASTER<sup>48</sup> with the default settings, and their sequence alignment was  
121 conducted using LAST<sup>49</sup> with the default settings. CRISPR arrays were predicted using the CRISPR

122 Recognition Tool<sup>50</sup> with the default settings, and *cas* genes were annotated by querying 101 known  
123 CRISPR-associated genes in TIGRFAM<sup>51</sup> using HMMER<sup>45</sup> with a threshold of e-value  $\leq 1E-5$ .

124

## 125 **Metaepigenomic and RM system analyses**

126 DNA methylation detection and motif analysis were performed according to BaseMod  
127 (<https://github.com/ben-lerch/BaseMod-3.0>). Briefly, the subreads were mapped to the assembled contigs  
128 using BLASR,<sup>38</sup> and interpulse duration ratios were calculated. Candidate motifs with scores higher than the  
129 default threshold value were retrieved as methylated motifs. Those with infrequent occurrences ( $<50$ ) or very  
130 low methylation fractions ( $<1\%$ ) in each genome bin were excluded from further analysis.

131 Genes encoding MTases, restriction endonucleases (REases), and DNA sequence-recognition  
132 proteins were detected by BLASTP<sup>34</sup> searches against an experimentally confirmed gold-standard dataset  
133 from the Restriction Enzyme Database (REBASE)<sup>52</sup>, with a cut-off e-value of  $\leq 1E-15$ . Sequence specificity  
134 information for each hit MTase gene was also retrieved from REBASE.

135

## 136 **Experimental verification of MTase activities**

137 Four estimated MTase genes (EMGBS3\_12600, EMGBS15\_03820, EMGBS10\_10070, and  
138 EMGBD2\_08790) were artificially synthesized with codon optimization and cloned into the pUC57 cloning  
139 vector by Genewiz (Table S1). The genes were subcloned into the pCold III expression vector (Takara Bio)  
140 using an In-FusionHD Cloning Kit (Takara Bio). The gene-specific oligonucleotide primers used for  
141 polymerase chain reaction and recombination are described in Table S2. For verification of the  
142 EMGBS10\_10070 gene function, the 5'-ACGAGTC-3' sequence was inserted downstream of the termination  
143 codon for the sake of the methylation assay (the first five-base ACGAG sequence was the estimated  
144 methylated motif, and the last five-base GAGTC is recognized by the restriction enzyme PseI) (Table S1).

145 The constructs were transformed into *Escherichia coli* HST04 *dam*<sup>-</sup>/*dcm*<sup>-</sup> (Takara Bio), which lacks  
146 endogenous MTases. The *E. coli* strains were cultured in LB broth medium supplemented with ampicillin.  
147 MTase expression was induced according to the supplier's protocol. Plasmid DNAs were isolated using the  
148 FastGene Xpress Plasmid PLUS Kit (Nippon Genetics). SalI was employed to linearize the plasmid DNAs

149 encoding EMGBS3\_12600 and EMGBS15\_03820 and then inactivated by heat. Methylation statuses were  
150 assayed by enzymatic digestion using the following restriction enzymes: BceAI and TseI for EMGBS3\_12600,  
151 DpnII and XmnI for EMGBS15\_03820, PfiI for EMGBS10\_10070, and FokI for EMGBD2\_08790. All  
152 restriction enzymes were purchased from New England BioLabs. All digestion reactions were performed at  
153 37°C for 1 h, except for those involving TseI (8 h) and FokI (20 min). Notably, although TseI digestion is  
154 conducted at 65°C in the manufacturer's protocol, we adopted a temperature of 37°C to avoid cleavage of  
155 methylated DNA.

156 We further verified the methylated motifs that were newly estimated in this study, *i.e.*, those of  
157 EMGBS10\_10070 and EMGBD2\_08790. Chromosomal DNA was extracted from cultures of the transformed  
158 *E. coli* strains using a PowerSoil DNA Isolation Kit (QIAGEN) according to the supplier's protocol. SMRT  
159 sequencing was conducted using PacBio RSII (Pacific Biosciences), and methylated motifs were detected via  
160 the same method described above.

161

## 162 **Data deposition**

163 The raw sequencing data and assembled genomes were deposited in the DDBJ Sequence Read Archive and  
164 DDBJ/ENA/GenBank, respectively (Table S3). All data were registered under BioProject ID PRJDB6656.

165

## 166 **Results and discussion**

### 167 **Water sampling, SMRT sequencing, and circular consensus analysis**

168 Water samples were collected at a pelagic site in Lake Biwa, Japan, at 5 m (biwa\_5m) and 65 m  
169 depths (biwa\_65m), from which PacBio Sequel produced a total of 2.6 million (9.6 Gbp) and 2.0 million (6.4  
170 Gbp) subreads, respectively (Table 1). The circular consensus analysis produced 168,599 and 117,802 CCS  
171 reads, with lengths of  $4,474 \pm 931$  and  $4,394 \pm 587$  bp, respectively (Table 1 and Fig. S2). In the shallow  
172 sample data, at least 90% of the CCS reads showed high quality (Phred quality scores >20) at each base  
173 position, except for the 5'-terminal five bases and 3'-terminal bases after the 5,638th base. In the deep sample  
174 data, the same was true, except for the 5'-terminal four bases and 3'-terminal bases after the 5,356th base (Fig.  
175 S3).

176

## 177 Taxonomic analysis

178 Taxonomic assignment of the CCS reads was performed using Kaiju<sup>28</sup> and the NCBI NR database<sup>29</sup>  
179 (Fig. 1). The assignment ratios were >88% and >56% at the phylum and genus levels, respectively, which  
180 were higher than those for the Illumina-based shotgun metagenomic analysis of lake freshwater and other  
181 environments using the same computational method<sup>28</sup>. Kraken<sup>30</sup> with complete prokaryotic and viral genomes  
182 in RefSeq<sup>31</sup> (Fig. S4a-c) provided similar results but resulted in much lower assignment ratios (30% and 27%,  
183 respectively), likely due to the lack of genomic data for freshwater microbes in RefSeq. 16S rRNA  
184 sequence-based taxonomic assignment via BLASTN searches against the SILVA database<sup>53</sup> also provided  
185 consistent results (Fig. S4d-f). It should be noted that 16S rRNA-based and CDS-based taxonomic  
186 assignments can be affected by 16S rRNA gene copy numbers and genome sizes, respectively.

187 At the phylum level, Proteobacteria dominated both samples, followed by Actinobacteria,  
188 Verrucomicrobia, and Bacteroidetes (Fig. 1). Chloroflexi and Thaumarchaeota were especially abundant in the  
189 deep water sample, consistent with previous findings<sup>54,55</sup>. The ratio of Archaea was particularly low in the  
190 shallow sample (0.6 and 6.9% in biwa\_5m and biwa\_65m, respectively). Although the filter pore-size range  
191 (5–0.2 µm) was not suitable for most viruses and eukaryotic cells, non-negligible ratios corresponding to their  
192 existence were observed in the shallow sample. The dominant eukaryotic phylum was Opisthokonta (2.68 and  
193 0.92%), followed by Alveolata (1.67 and 0.45%) and Stramenopiles (1.45 and 0.15%). Among viruses,  
194 Caudovirales and Phycodnaviridae were the most abundant families in both samples. Caudovirales are known  
195 to act as bacteriophages, while Phycodnaviridae primarily infect eukaryotic algae. The third most abundant  
196 viral family was Mimiviridae, whose members are also known as ‘Megavirales’ due to their large genome size  
197 (0.6–1.3 Mbp)<sup>56,57</sup>. Viruses without double-stranded DNA (*i.e.*, single-stranded DNA and RNA viruses) were  
198 not observed because of the experimental method employed. Overall, the taxonomic composition was  
199 consistent with those obtained in previous studies on microbial communities in freshwater lake environments,  
200 reflecting the fact that SMRT sequencing provides taxonomic compositions consistent with those obtained  
201 using short-read technologies, such as the Illumina MiSeq and HiSeq platforms<sup>58,59</sup>.

202



## 203 **Metagenomic assembly and genome binning**

204 The CCS reads from the shallow and deep samples were assembled into 554 and 345 contigs,  
205 respectively, using Canu<sup>18</sup> (Table S4). The corresponding N50 values were 83 and 76 kbp, and the longest  
206 contigs had lengths of 481 and 740 kbp, respectively. Notably, the contigs were much longer than those  
207 obtained in a previous study that applied CCS for shotgun metagenomics analysis of an active sludge  
208 microbial community<sup>22</sup>. We also used Mira<sup>36</sup> for metagenomic assembly, but this resulted in shorter longest  
209 contigs (148 and 151 kbp, respectively) and N50 values (19 and 18 kbp, respectively).

210 The contigs were binned to genomes using MetaBAT<sup>37</sup>, which is a reference-independent binning  
211 tool, based on CCS-read coverage and tetranucleotide frequency (Fig. 2 and Table 2). Among a total of 899  
212 contigs, 390 (43.3%) were assigned to fifteen and four bins from the shallow and deep samples, respectively.  
213 We obtained a draft genome for each bin, where the completeness of the genome ranged from 17–99% (67%  
214 on average). Estimated contamination levels were low (<3% in each bin). Based on the total contig size and  
215 estimated genome completeness of each bin, the genome sizes were estimated to range from 1.0–5.6 Mbp.  
216 The GC content ranged from 29–68%, and the average N50 was 24 kbp, with a maximum of 1.67 Mbp.

217 The nineteen genome bins belonged to seven phyla (Table 2 and Fig. S5). Among these genome bins,  
218 ten contained 16S rRNA genes, and many of them showed top hits to uncultured clades; thus, our CCS-based  
219 approach was estimated to have truly targeted multiple uncultured prokaryotes. Seven genome bins were  
220 predicted to belong to the phylum Actinobacteria, including *Candidatus* Planktophila (BS7), one of the most  
221 dominant bacterioplankton lineages in freshwater systems<sup>60,61</sup>. Metagenomic bins affiliated with other  
222 dominant freshwater lineages were also recovered, including *Candidatus* Methylopumilus (BS12)<sup>62</sup>, the  
223 freshwater lineage (LD12) of Pelagibacterales (BS14)<sup>63,64</sup>, and Nitrospirae (BD2) and *Candidatus*  
224 Nitrosoarchaeum (BD3), the predominant nitrifying bacteria and archaea in the hypolimnion, respectively<sup>54,55</sup>.  
225 Four bins were affiliated with the phylum Verrucomicrobia (BS6, BS8, BS10, and BD4), in line with a  
226 previous study<sup>65</sup>. The BS3 and BD1 genome bins likely represent members of the CL500-11 group (class  
227 Anaerolineae) of the Chloroflexi phylum, where BD1 presented the highest coverage of >45×. This group is a  
228 dominant group in the hypolimnion of Lake Biwa and is frequently found in deep oligotrophic freshwater  
229 environments worldwide<sup>66</sup>. Overall, the phylogeny of the reconstructed genomes likely reflects the major  
230 dominant lineages present in the water of Lake Biwa.

231

## 232 **Metaepigenomic analysis**

233 A total of 29 methylated motifs were detected in ten genome bins (Table 3). Their methylation  
234 ratios ranged from 19–99%, which can be affected by modification detection power, *i.e.*, these ratios are likely  
235 lower than the true methylation levels. Three motifs from the BS12 genome bin contained overlapping  
236 sequences (HCAGCTKC, BGMAGCTGD, and GMAGCTKC, where B: G/T/C, D: G/A/T, H: A/C/T, K: G/T,  
237 and M: A/C, where the underlined bold face indicates methylation sites) that were likely due to incomplete  
238 detection of a single methylated motif or heterogeneous motif sequences between closely related lineages  
239 contained within that genome bin. A palindromic motif and five complementary motif pairs that likely reflect  
240 double-strand methylation were observed in the BS15 bin (*e.g.*, a pair of AGCNNNNNNNCAT and  
241 ATGNNNNNNGCT). It may also be notable that three genome bins from the Chloroflexi phylum (BS1, BS3,  
242 and BD1) shared the same motif sequence set (GANTC, TTAAA, and GCWGC, where W: A/T), likely due to  
243 evolutionarily shared methylation systems.

244 Overall, even if such overlapping, complementary, and shared motif sequences are considered, at  
245 least 14 motifs still presented no match to existing recognition sequences in the REBASE repository. This  
246 result demonstrates the existence of unexplored diversity of DNA methylation systems in environmental  
247 prokaryotes, which include many uncultured strains.

248

## 249 **Known MTases that correspond to detected methylated motifs**

250 To identify MTases that can catalyze the methylation reactions of the detected methylated motifs,  
251 systematic annotation of MTase genes was performed. Sequence similarity searches against known genes  
252 identified 20 MTase genes in nine genome bins (sequence identities ranged from 23–71%) (Table 4). The  
253 most abundant group was Type II MTases, followed by Type I and Type III MTases, a trend that is consistent  
254 with the general MTase distribution<sup>13,67</sup>. Several genes encoding REases and DNA sequence-recognition  
255 proteins were also detected (Table 4). The known motifs of seven of the 20 MTases were matched to those  
256 identified in our metaepigenomic analysis (Table 3). For example, the genome bin BD3 contained two  
257 MTases, whose recognition motif sequences were AGCT and GATC according to the sequence  
258 homology-based prediction, which were perfectly congruent with the two motifs detected in our  
259 metaepigenomic analysis. It may be notable that these two motifs were also reported in an enrichment-culture  
260 study of the closely related genus *Candidatus Nitrosomarinus catalina*<sup>68</sup> and are therefore likely evolutionarily

261 conserved within their group. In the BS14 bin, a similar one-to-one perfect match was also observed. The two  
262 Chloroflexi genome bins BS3 and BD1 were characterized by the same set of three methylated motifs, each of  
263 which contained three MTases. No MTase gene was found in the other Chloroflexi bin BS1, likely due to its  
264 low estimated genome completeness of 31% (Table 2). Among these MTases, two were predicted to show  
265 methylation specificities that were congruent with two of the detected motifs, GANTC and TTAA (the other  
266 MTase and motif will be discussed in the next section). Collectively, these observations suggest that  
267 metaepigenomic analysis is an effective tool for identifying the methylation systems of environmental  
268 prokaryotes.

269

### 270 **Unexplored diversity of prokaryotic methylation systems**

271 Among the 20 detected MTases, 13 MTases did not present known recognition motifs that matched  
272 those identified in our metaepigenomic analysis (Tables 3 and 4). Although homology search-based MTase  
273 identification and recognition motif estimation are frequently conducted in genomic and metagenomic studies,  
274 this result suggests that these approaches are not sufficient, and direct observation of DNA methylation is  
275 needed to reveal the methylation systems of diverse environmental prokaryotes.

276 As noted earlier, each of the BS3 and BD1 bins had three MTase genes, two of which were  
277 congruent to two of the detected motifs. The other MTase from each bin (EMGBS3\_12600 and  
278 EMGBD1\_09320 in BS3 and BD1, respectively) showed the highest sequence similarity to an MTase that  
279 was reported to recognize ACGGC; however, the other methylated motif detected in the BS3 and BD1 bins  
280 was GCWGC.

281 In the BS15 genome bin, six MTases and eleven methylated motifs were detected, but none of the  
282 MTases and motifs matched each other. At the methylation type level, five MTases and all of the methylated  
283 motifs were of the m6A type. We predicted that the EMGBS15\_03820 MTase, which is estimated to exhibit  
284 non-specific m6A methylation activity, is actually a sequence-specific enzyme that recognizes a  
285 GAANNNTTC motif that was detected through metaepigenomic analysis, because the adjacent gene  
286 EMGBS15\_03830 encodes an REase that targets the same GAANNNTTC sequence.

287 In the BS8 genome bin, one MTase and one methylated motif were detected; however, the  
288 estimated motif of this MTase was incongruent with the detected motif (the estimated and detected motifs  
289 were ACGANNNNNGRTC and AGGNNNNNR<sup>T</sup>TTT, respectively, where R: G/A). This MTase is predicted

290 to function in an RM system because of the existence of the neighboring REase and DNA-sequence  
291 recognition protein genes.

292 In the BS10 genome bin, one MTase and one methylated motif were detected, and their motifs were  
293 also incongruent (GCAAGG and ACGAG, respectively).

294 In the BD2 genome bin, two MTases and one methylated motif were detected. The two MTases  
295 were predicted to display m6A and m5C methylation activities, while the detected motif contained an m6A  
296 site. Thus, the former MTase was predicted to catalyze the methylation reaction, although their motifs were  
297 again incongruent (GRGGAAG and TANGGAB, respectively). It should also be noted that these MTases  
298 appear to constitute a recently proposed system known as the Defense Island System Associated with  
299 Restriction-Modification (DISARM), which is a phage-infection defense system composed of MTase, helicase,  
300 phospholipase D, and DUF1998 genes<sup>69</sup>. To our knowledge, this is the first DISARM system identified in the  
301 phylum Nitrospirae.

302 In the BS6 genome bin, one MTase gene was found, but we could not detect any methylated motif,  
303 and we therefore anticipate that this MTase gene does not exhibit methylation activity or the corresponding  
304 methylation motif was undetected due to the low sensitivity of SMTR sequencing to m5C modification as  
305 described previously<sup>13,14</sup>. However, in the BS12 genome bin, we detected methylated motifs but no MTase  
306 genes. We assume that the MTase genes corresponding to this bin were missed due to insufficient genome  
307 completeness (although the estimated completeness was 81%), or because these MTase genes have diverged  
308 considerably from MTase genes found in cultivable strains, or because these MTases belong to a new group.

309

### 310 **Experimental verification of MTases with new methylated motifs**

311 Among the MTases whose estimated methylated motifs were not congruent with our  
312 metaepigenomic results, we experimentally verified the methylation specificities of the four MTases:  
313 EMGBS3\_12600 in BS3 (and EMGBD1\_09320 in BD1, which has exactly the same amino acid sequence),  
314 EMGBS15\_03820 in BS15, EMGBS10\_10070 in BS10, and EMGBD2\_08790 in BD2 (Table 4). We  
315 constructed plasmids that each carried one of the artificially synthesized MTase genes, which we then  
316 transformed *E. coli* cells that lacked endogenous MTases, forced their expression, and observed the  
317 methylation status of the isolated plasmid DNA by REase digestion.

318 Although the estimated methylated motif sequence of EMGBS3\_12600 was ACGGC, the  
319 unaccounted-for motif sequence observed in BS3 was GCWGC. Thus, we hypothesized that the true  
320 recognition sequence of EMGBS3\_12600 is GCWGC. The REase digestion assay showed that TseI (GCWGC  
321 specificity) did not cleave the plasmids when EMGBS3\_12600 was expressed in the cells, which clearly  
322 supports our hypothesis (Fig. 3a). Furthermore, we confirmed that BceAI (ACGGC specificity) cleaved  
323 plasmids regardless of whether EMGBS3\_12600 was expressed, indicating that the EMGBS3\_12600 protein  
324 does not show ACGGC sequence specificity (Fig. 3a). Accordingly, we named this protein M.AspBS3I, as a  
325 novel MTase that possesses GCWGC specificity (Table 4).

326 While the homology-based analysis predicted EMGBS15\_03820 as a non-sequence specific MTase,  
327 its adjacency to an REase and the results of the metaepigenomic analysis suggested that this MTase presents  
328 GAANNNTTC sequence specificity. The REase digestion assay showed that XmnI (GAANNNTTC  
329 specificity) did not cleave the plasmids only when EMGBS15\_03820 was expressed in the cells, which also  
330 supports our hypothesis (Fig. 3b). Furthermore, we confirmed that DpnII (GATC specificity) cleaved the  
331 plasmids regardless of whether EMGBS15\_03820 was expressed, indicating that EMGBS15\_03820 is not a  
332 nonspecific MTase. We named this protein M.FspBS15I, as a novel MTase that possesses GAANNNTTC  
333 methylation specificity (Table 4).

334 For EMGBS10\_10070 in BS10 and EMGBD2\_08790 in BD2, we also conducted REase digestion  
335 assays to confirm the recognition motif sequences. Based on the results of the metaepigenomic analysis, their  
336 motifs were predicted to be ACGAG and TANGGAB, respectively. Expression of each gene altered the  
337 electrophoresis patterns of the digested plasmids to contain fragments that resulted from inhibition of REase  
338 cleavage at the estimated methylation sites (Fig. S6). Furthermore, we additionally conducted SMRT  
339 sequencing analysis using the PacBio RSII platform to examine the methylation status of the chromosomal  
340 DNA of the *E. coli* transformed with each of the two MTase genes. The results were basically consistent  
341 (Table S5): ACGAG was actually detected as the methylated motif in *E. coli* transformed with  
342 EMGBS10\_10070, and we named the protein M.OspBS10I. In the case of EMGBD2\_08790, the detected  
343 TAHGGAB motif was almost the same, but a subset of the estimated TANGGAB motif (*i.e.*, TAGGGAB was  
344 excluded), and this difference could be due to *E. coli*-specific conditions (*e.g.*, cofactors and sequence biases),  
345 insufficient data, or inaccuracy of the methylated motif detection method. Regardless of this minor difference,  
346 we concluded that EMGBD2\_08790 is a novel MTase gene responsible for methylation of the TAHGGAB  
347 motif and we named the protein M.NspBD2I accordingly.

348

## 349 **Genome bins that lack methylation systems and phage infection**

350           Among the nineteen genome bins, no methylated motifs were detected in nine genome bins (MTase  
351 genes were also not detected, except in the BS6 genome bin). This high ratio of methylation-lacking  
352 organisms contrasts remarkably with a previous report in which prokaryotic genomes were found to rarely  
353 lack DNA methylation systems (<7%)<sup>13</sup>. Notably, those nine genome bins contained seven Actinobacteria  
354 bins, indicating that the dominant Actinobacteria in Lake Biwa lack methylation systems, although a number  
355 of methylated motifs and corresponding MTases have been reported in Actinobacteria<sup>13</sup>.

356           Because DNA methylation is known to play a role in opposing phage infection<sup>2-4</sup>, we conducted *in*  
357 *silico* prophage detection to evaluate whether prokaryotes in Lake Biwa tend to be infected by phages. Within  
358 the nineteen genome bins, more than one prophage was found in ten genome bins (Table 2 and S6). Among  
359 these ten bins, six overlapped with the nine genome bins in which no methylated motifs were identified. The  
360 prophages showed little sequence similarity to each other except for two pairs and likely resulted from  
361 independent and repetitive infections (Fig. S7). Thus, phage infection and prophage integration appear to  
362 frequently occur in prokaryotes that lack DNA methylation systems. We also investigated the presence of  
363 CRISPR/Cas systems as another major prokaryotic mechanism against phage infections<sup>70-73</sup>. We identified  
364 possible CRISPR arrays in three genome bins, BS3, BS8, and BD3, which exhibit methylation systems but no  
365 prophages, although the first two genome bins contained no associated *Cas* genes.

366           Based on these results, we assume that the possession of prophages is tolerable in lake freshwater  
367 environments, and thus, the evolutionary pressure to develop or retain methylation systems is low. These  
368 results also suggest that uncultured and cultivable strains may be under different selection pressures regarding  
369 DNA methylation systems, and the true diversity of microbial methylation systems must be examined in the  
370 future using metaepigenomic approaches.

371

## 372 **Conclusion**

373           The present study demonstrated the effectiveness of the metaepigenomic approach powered by  
374 SMRT sequencing and CCS, showing obvious advantages over sequence similarity-based and culture-based  
375 methylation system analyses and short-read metagenomics. The CCS reads facilitated metagenomic assembly,  
376 binning, and protein sequence-based taxonomic assignment from an environmental sample that contained  
377 dominant uncultured prokaryotes. Most importantly, this approach revealed several methylated motifs,

378 including novel ones in environmental prokaryotes, and subsequent experiments identified four MTases  
379 responsible for those reactions. The anti-correlation pattern between the presence of prophages and  
380 methylation was consistent with past observations that methylation systems inhibit phage infection and  
381 phage-mediated genetic exchange, although the underlying ecological background and mechanisms must be  
382 examined in the future.

383         The current throughput of SMRT sequencing may be still insufficient to apply the metaepigenomic  
384 approach to more diverse and complex samples. Because deep sequencing coverage (>25× subreads for each  
385 DNA strand) is required for the reliable detection of DNA methylation, it is still difficult to obtain sufficient  
386 sequencing reads to recover long contigs and detect methylated motifs for ‘rare’ species (typically those with  
387 <1% relative abundance). In addition to rapid and ongoing technological advances in SMRT sequencing, the  
388 emergence of Oxford Nanopore Technology may provide as another long-read, single-molecule, and  
389 methylation-detectable technology<sup>74,75</sup>. Another problem is that the detectable types of DNA modifications are  
390 limited (*i.e.*, m4C, m5C, and m6A) with the currently available SMRT sequencing technology, while many  
391 other DNA chemical modifications occur in nature<sup>76</sup>. In addition to advances in sequencing methods, novel  
392 bioinformatic tools will be critical for metaepigenomic analyses of environmental prokaryotes.

393         A recent study showed that sets of methylated motifs and MTases can vary widely, even between  
394 closely related strains<sup>77</sup>, where metaepigenomics is expected to enable differential methylation analyses  
395 between populations. In addition, genus-level conservation of MTases that are not associated with REases is  
396 sometimes observed, which suggests that MTases play unexplored adaptive roles, in addition to their  
397 functions in combating phages<sup>13,78</sup>. Novel MTases may be adopted for biotechnological uses, such as DNA  
398 recombination and methylation analyses<sup>79</sup>. It is envisioned that metaepigenomics of environmental  
399 prokaryotes under different sampling conditions and environments will significantly deepen our understanding  
400 of the enigmatic evolution of prokaryotic methylation systems and broaden their application potential.

401

#### 402 **Author Contributions**

403 SH conceived the study, performed the bioinformatics analyses and experiments, and wrote the manuscript.  
404 YO and SN performed the water sampling. AM performed the experiments. AT performed the genomic and  
405 metagenomic sequencing. WI conceived the study, wrote the manuscript, and supervised the project. All  
406 authors read and approved the final manuscript.

407

## 408 **Funding**

409 This work was supported by the Japan Science and Technology Agency (CREST), the Japan Society for the  
410 Promotion of Science (Grant Numbers 15J00971, 15J08604, 15H01725, 16H06154, and 17H05834), the  
411 Ministry of Education, Culture, Sports, Science, and Technology in Japan (221S0002 and 16H06279), and  
412 Leave a Nest Grant.

413

## 414 **Conflict of Interest Statement**

415 The authors declare that the research was conducted in the absence of any commercial or financial  
416 relationships that could be construed as a potential conflict of interest.

417

## 418 **Acknowledgments**

419 The SMRT sequencing was supported by National Institute of Genetic, Research organization of information  
420 and systems, Mishima, Japan. We thank Yoshinori Nii, Masashi Yoshino, and Satoko Fukuda for their helpful  
421 suggestions and experimental supports. We are grateful to Yukiko Goda and Tetsuji Akatsuka for their  
422 assistance in the field sampling. We also thank Metabologenomics, Inc. for financial support.

423

## 424 **References**

- 425 1. Kumar, R. & Rao, D. N. Role of DNA Methyltransferases in Epigenetic Regulation in Bacteria. in  
426 *Subcellular Biochemistry* (ed. Kundu, T. K.) **61**, 81–102 (Springer Netherlands, 2013).
- 427 2. Labrie, S. J., Samson, J. E. & Moineau, S. Bacteriophage resistance mechanisms. *Nat. Rev. Microbiol.*  
428 **8**, 317 (2010).
- 429 3. Kobayashi, I. Behavior of restriction–modification systems as selfish mobile elements and their impact  
430 on genome evolution. *Nucleic Acids Res.* **29**, 3742–3756 (2001).
- 431 4. Makarova, K. S., Wolf, Y. I., Snir, S. & Koonin, E. V. Defense islands in bacterial and archaeal  
432 genomes and prediction of novel defense systems. *J. Bacteriol.* **193**, 6039–6056 (2011).



- 433 5. Wion, D. & Casadesús, J. N<sup>6</sup>-methyl-adenine: An epigenetic signal for DNA–protein interactions. *Nat.*  
434 *Rev. Microbiol.* **4**, 183–192 (2006).
- 435 6. Low, D. A. & Casadesús, J. Clocks and switches: Bacterial gene regulation by DNA adenine  
436 methylation. *Curr. Opin. Microbiol.* **11**, 106–112 (2008).
- 437 7. Casadesus, J. & Low, D. Epigenetic gene regulation in the bacterial world. *Microbiol. Mol. Biol. Rev.*  
438 **70**, 830–856 (2006).
- 439 8. Vasu, K. & Nagaraja, V. Diverse functions of restriction-modification systems in addition to cellular  
440 defense. *Microbiol. Mol. Biol. Rev.* **77**, 53–72 (2013).
- 441 9. Kozdon, J. B. *et al.* Global methylation state at base-pair resolution of the *Caulobacter* genome  
442 throughout the cell cycle. *Proc. Natl. Acad. Sci. U. S. A.* **110**, E4658–E4667 (2013).
- 443 10. Srikhanta, Y. N., Fox, K. L. & Jennings, M. P. The phasevarion: Phase variation of type III DNA  
444 methyltransferases controls coordinated switching in multiple genes. *Nat. Rev. Microbiol.* **8**, 196  
445 (2010).
- 446 11. Flusberg, B. A. *et al.* Direct detection of DNA methylation during single-molecule, real-time  
447 sequencing. *Nat. Methods* **7**, 461–465 (2010).
- 448 12. Clark, T. A. *et al.* Characterization of DNA methyltransferase specificities using single-molecule,  
449 real-time DNA sequencing. *Nucleic Acids Res.* **40**, e29 (2012).
- 450 13. Blow, M. J. *et al.* The Epigenomic Landscape of Prokaryotes. *PLoS Genet.* **12**, e1005854 (2016).
- 451 14. Murray, I. A. *et al.* The methylomes of six bacteria. *Nucleic Acids Res.* **40**, 11450–11462 (2012).
- 452 15. Vinet, L. & Zhedanov, A. A ‘missing’ family of classical orthogonal polynomials. *Science (80-. )*. **323**,  
453 133–138 (2010).
- 454 16. Koren, S. *et al.* Hybrid error correction and de novo assembly of single-molecule sequencing reads.  
455 *Nat. Biotechnol.* **30**, 693–700 (2012).
- 456 17. Rhoads, A. & Au, K. F. PacBio sequencing and its applications. *Genomics. Proteomics Bioinformatics*  
457 **13**, 278–289 (2015).
- 458 18. Koren, S. *et al.* Canu: Scalable and accurate long-read assembly via adaptive k-mer weighting and  
459 repeat separation. *Genome Res.* **27**, 722–736 (2017).
- 460 19. Fichot, E. B. & Norman, R. S. Microbial phylogenetic profiling with the Pacific Biosciences  
461 sequencing platform. *Microbiome* **1**, 10 (2013).
- 462 20. Gao, S. *et al.* PacBio full-length transcriptome profiling of insect mitochondrial gene expression. *RNA*  
463 *Biol.* **13**, 820–825 (2016).
- 464 21. Hiraoka, S., Yang, C. & Iwasaki, W. Metagenomics and bioinformatics in microbial ecology: Current  
465 status and beyond. *Microbes Environ.* **31**, 204–212 (2016).

- 466 22. Frank, J. A. *et al.* Improved metagenome assemblies and taxonomic binning using long-read circular  
467 consensus sequence data. *Sci. Rep.* **6**, 25373 (2016).
- 468 23. Paez-Espino, D. *et al.* Uncovering Earth’s virome. *Nature* **536**, 425 (2016).
- 469 24. Moon, K., Kang, I., Kim, S., Kim, S.-J. & Cho, J.-C. Genomic and ecological study of two distinctive  
470 freshwater bacteriophages infecting a Comamonadaceae bacterium. *Sci. Rep.* **8**, 7989 (2018).
- 471 25. Moon, K., Kang, I., Kim, S., Kim, S.-J. & Cho, J.-C. Genome characteristics and environmental  
472 distribution of the first phage that infects the LD28 clade, a freshwater methylophilic bacterial group.  
473 *Environ. Microbiol.* **19**, 4714–4727 (2017).
- 474 26. Ghai, R., Mehrshad, M., Megumi Mizuno, C. & Rodriguez-Valera, F. Metagenomic recovery of phage  
475 genomes of uncultured freshwater actinobacteria. *ISME J.* **11**, 304–308 (2017).
- 476 27. Albertsen, M., Karst, S. M., Ziegler, A. S., Kirkegaard, R. H. & Nielsen, P. H. Back to basics—The  
477 influence of DNA extraction and primer choice on phylogenetic analysis of activated sludge  
478 communities. *PLoS One* **10**, e0132783 (2015).
- 479 28. Menzel, P., Ng, K. L. & Krogh, A. Fast and sensitive taxonomic classification for metagenomics with  
480 Kaiju. *Nat. Commun.* **7**, 11257 (2016).
- 481 29. Coordinators, N. R. Database resources of the National Center for Biotechnology Information. *Nucleic  
482 Acids Res.* **45**, D12–D17 (2017).
- 483 30. Wood, D. E. & Salzberg, S. L. Kraken: Ultrafast metagenomic sequence classification using exact  
484 alignments. *Genome Biol.* **15**, R46 (2014).
- 485 31. Tatusova, T., Ciufo, S., Fedorov, B., O’Neill, K. & Tolstoy, I. RefSeq microbial genomes database:  
486 New representation and annotation strategy. *Nucleic Acids Res.* **42**, D553–D559 (2014).
- 487 32. Kopylova, E., Noé, L. & Touzet, H. SortMeRNA: Fast and accurate filtering of ribosomal RNAs in  
488 metatranscriptomic data. *Bioinformatics* **28**, 3211–3217 (2012).
- 489 33. Lagesen, K. *et al.* RNAmmer: Consistent and rapid annotation of ribosomal RNA genes. *Nucleic Acids  
490 Res.* **35**, 3100–3108 (2007).
- 491 34. Camacho, C. *et al.* BLAST+: Architecture and applications. *BMC Bioinformatics* **10**, 1–9 (2009).
- 492 35. Quast, C. *et al.* The SILVA ribosomal RNA gene database project: Improved data processing and  
493 web-based tools. *Nucleic Acids Res.* **41**, D590–D596 (2013).
- 494 36. Chevreux B & Suhai, S. Genome Sequence Assembly Using Trace Signals and Additional Sequence  
495 Information. in *German conference on bioinformatics* **99**, 45–56 (Hanover, Germany, 1999).
- 496 37. Kang, D. D., Froula, J., Egan, R. & Wang, Z. MetaBAT, an efficient tool for accurately reconstructing  
497 single genomes from complex microbial communities. *PeerJ* **3**, e1165 (2015).

- 498 38. Chaisson, M. J. & Tesler, G. Mapping single molecule sequencing reads using basic local alignment  
499 with successive refinement (BLASR): Application and theory. *BMC Bioinformatics* **13**, 238 (2012).
- 500 39. Parks, D. H., Imelfort, M., Skennerton, C. T., Hugenholtz, P. & Tyson, G. W. CheckM: Assessing the  
501 quality of microbial genomes recovered from isolates, single cells, and metagenomes. *Genome Res.* **25**,  
502 1043–1055 (2015).
- 503 40. Cambuy, D. D., Coutinho, F. H. & Dutilh, B. E. Contig annotation tool CAT robustly classifies  
504 assembled metagenomic contigs and long sequences. *bioRxiv* 072868 (2016). doi:10.1101/072868
- 505 41. Hyatt, D. *et al.* Prodigal: Prokaryotic gene recognition and translation initiation site identification.  
506 *BMC Bioinformatics* **11**, 119 (2010).
- 507 42. Suzuki, S., Kakuta, M., Ishida, T. & Akiyama, Y. Faster sequence homology searches by clustering  
508 subsequences. *Bioinformatics* **31**, 1183–1190 (2015).
- 509 43. Powell, S. *et al.* EggNOG v4.0: Nested orthology inference across 3686 organisms. *Nucleic Acids Res.*  
510 **42**, D231–D239 (2014).
- 511 44. UniProt Consortium. Update on activities at the Universal Protein Resource (UniProt) in 2013. *Nucleic*  
512 *Acids Res.* **41**, D43–D47 (2013).
- 513 45. Mistry, J., Finn, R. D., Eddy, S. R., Bateman, A. & Punta, M. Challenges in homology search:  
514 HMMER3 and convergent evolution of coiled-coil regions. *Nucleic Acids Res.* **41**, e121 (2013).
- 515 46. Finn, R. D. *et al.* The Pfam protein families database: Towards a more sustainable future. *Nucleic*  
516 *Acids Res.* **44**, D279–D285 (2016).
- 517 47. Segata, N., Börnigen, D., Morgan, X. C. & Huttenhower, C. PhyloPhlAn is a new method for  
518 improved phylogenetic and taxonomic placement of microbes. *Nat. Commun.* **4**, 2304 (2013).
- 519 48. Arndt, D. *et al.* PHASTER: A better, faster version of the PHAST phage search tool. *Nucleic Acids Res.*  
520 **44**, W16–W21 (2016).
- 521 49. Kiełbasa, S. M., Wan, R., Sato, K., Horton, P. & Frith, M. C. Adaptive seeds tame genomic sequence  
522 comparison. *Genome Res.* **21**, 487–493 (2011).
- 523 50. Bland, C. *et al.* CRISPR recognition tool (CRT): A tool for automatic detection of clustered regularly  
524 interspaced palindromic repeats. *BMC Bioinformatics* **8**, 209 (2007).
- 525 51. Haft, D. H. *et al.* TIGRFAMs and genome properties in 2013. *Nucleic Acids Res.* **41**, D387–D395  
526 (2013).
- 527 52. Roberts, R. J., Vincze, T., Posfai, J. & Macelis, D. REBASE—a database for DNA restriction and  
528 modification: Enzymes, genes and genomes. *Nucleic Acids Res.* **38**, D234–D236 (2010).
- 529 53. Yilmaz, P. *et al.* The SILVA and “all-species living tree project (LTP)” taxonomic frameworks.  
530 *Nucleic Acids Res.* **42**, D643–8 (2014).

- 531 54. Okazaki, Y. & Nakano, S.-I. Vertical partitioning of freshwater bacterioplankton community in a deep  
532 mesotrophic lake with a fully oxygenated hypolimnion (Lake Biwa, Japan). *Environ. Microbiol. Rep.* **8**,  
533 780–788 (2016).
- 534 55. Okazaki, Y. *et al.* Ubiquity and quantitative significance of bacterioplankton lineages inhabiting the  
535 oxygenated hypolimnion of deep freshwater lakes. *ISME J.* **11**, 2279–2293 (2017).
- 536 56. Colson, P. *et al.* “Megavirales”, a proposed new order for eukaryotic nucleocytoplasmic large DNA  
537 viruses. *Arch. Virol.* **158**, 2517–2521 (2013).
- 538 57. Claverie, J.-M. *et al.* Mimivirus and Mimiviridae: Giant viruses with an increasing number of potential  
539 hosts, including corals and sponges. *J. Invertebr. Pathol.* **101**, 172–180 (2009).
- 540 58. Tsai, Y.-C. *et al.* Resolving the complexity of human skin metagenomes using single-molecule  
541 sequencing. *MBio* **7**, e01948-15 (2016).
- 542 59. Singer, E. *et al.* Next generation sequencing data of a defined microbial mock community. *Sci. Data* **3**,  
543 160081 (2016).
- 544 60. Newton, R. J., Jones, S. E., Eiler, A., McMahon, K. D. & Bertilsson, S. A guide to the natural history  
545 of freshwater lake bacteria. *Microbiol. Mol. Biol. Rev.* **75**, 14–49 (2011).
- 546 61. Neuenschwander, S. M., Ghai, R., Pernthaler, J. & Salcher, M. M. Microdiversification in  
547 genome-streamlined ubiquitous freshwater Actinobacteria. *ISME J.* **12**, 185–198 (2018).
- 548 62. Salcher, M. M., Neuenschwander, S. M., Posch, T. & Pernthaler, J. The ecology of pelagic freshwater  
549 methylotrophs assessed by a high-resolution monitoring and isolation campaign. *ISME J.* **9**, 2442  
550 (2015).
- 551 63. Salcher, M. M., Pernthaler, J. & Posch, T. Seasonal bloom dynamics and ecophysiology of the  
552 freshwater sister clade of SAR11 bacteria that rule the waves (LD12). *ISME J.* **5**, 1242–1252 (2011).
- 553 64. Henson, M. W., Lanclos, V. C., Faircloth, B. C. & Thrash, J. C. Cultivation and genomics of the first  
554 freshwater SAR11 (LD12) isolate. *ISME J.* **12**, 1846–1860 (2018).
- 555 65. Cabello-Yeves, P. J. *et al.* Reconstruction of diverse verrucomicrobial genomes from metagenome  
556 datasets of freshwater reservoirs. *Frontiers in Microbiology* **8**, 2131 (2017).
- 557 66. Okazaki, Y., Hodoki, Y. & Nakano, S. Seasonal dominance of CL500-11 bacterioplankton (phylum  
558 Chloroflexi) in the oxygenated hypolimnion of Lake Biwa, Japan. *FEMS Microbiol. Ecol.* **83**, 82–92  
559 (2013).
- 560 67. Oliveira, P. H., Touchon, M. & Rocha, E. P. C. The interplay of restriction-modification systems with  
561 mobile genetic elements and their prokaryotic hosts. *Nucleic Acids Res.* **42**, 10618–10631 (2014).
- 562 68. Ahlgren, N. A. *et al.* Genome and epigenome of a novel marine Thaumarchaeota strain suggest viral  
563 infection, phosphorothioation DNA modification and multiple restriction systems. *Environ. Microbiol.*  
564 **19**, 2434–2452 (2017).

- 565 69. Ofir, G. *et al.* DISARM is a widespread bacterial defence system with broad anti-phage activities. *Nat.*  
566 *Microbiol.* **3**, 90–98 (2018).
- 567 70. Rath, D., Amlinger, L., Rath, A. & Lundgren, M. The CRISPR-Cas immune system: Biology,  
568 mechanisms and applications. *Biochimie* **117**, 119–128 (2015).
- 569 71. Jore, M. M., Brouns, S. J. J. & van der Oost, J. RNA in defense: CRISPRs protect prokaryotes against  
570 mobile genetic elements. *Cold Spring Harb. Perspect. Biol.* **4**, a003657 (2012).
- 571 72. Seed, K. D. Battling phages: How bacteria defend against viral attack. *PLoS Pathog.* **11**, e1004847  
572 (2015).
- 573 73. Makarova, K. S. *et al.* An updated evolutionary classification of CRISPR–Cas systems. *Nat. Rev.*  
574 *Microbiol.* **13**, 722 (2015).
- 575 74. Rand, A. C. *et al.* Mapping DNA methylation with high-throughput nanopore sequencing. *Nat.*  
576 *Methods* **14**, 411–413 (2017).
- 577 75. Stoiber, M. H. *et al.* *De novo* identification of DNA modifications enabled by genome-guided  
578 nanopore signal processing. *bioRxiv* 094672 (2016). doi:10.1101/094672
- 579 76. Davis, B. M., Chao, M. C. & Waldor, M. K. Entering the era of bacterial epigenomics with single  
580 molecule real time DNA sequencing. *Curr. Opin. Microbiol.* **16**, 192–198 (2013).
- 581 77. Kojima, K. K. *et al.* Population evolution of *Helicobacter pylori* through diversification in DNA  
582 methylation and interstrain sequence homogenization. *Mol. Biol. Evol.* **33**, 2848–2859 (2016).
- 583 78. Seshasayee, A. S. N., Singh, P. & Krishna, S. Context-dependent conservation of DNA  
584 methyltransferases in bacteria. *Nucleic Acids Res.* **40**, 7066–7073 (2012).
- 585 79. Buryanov, Y. & Shevchuk, T. The use of prokaryotic DNA methyltransferases as experimental and  
586 analytical tools in modern biology. *Anal. Biochem.* **338**, 1–11 (2005).

587

588

589 **Figures**

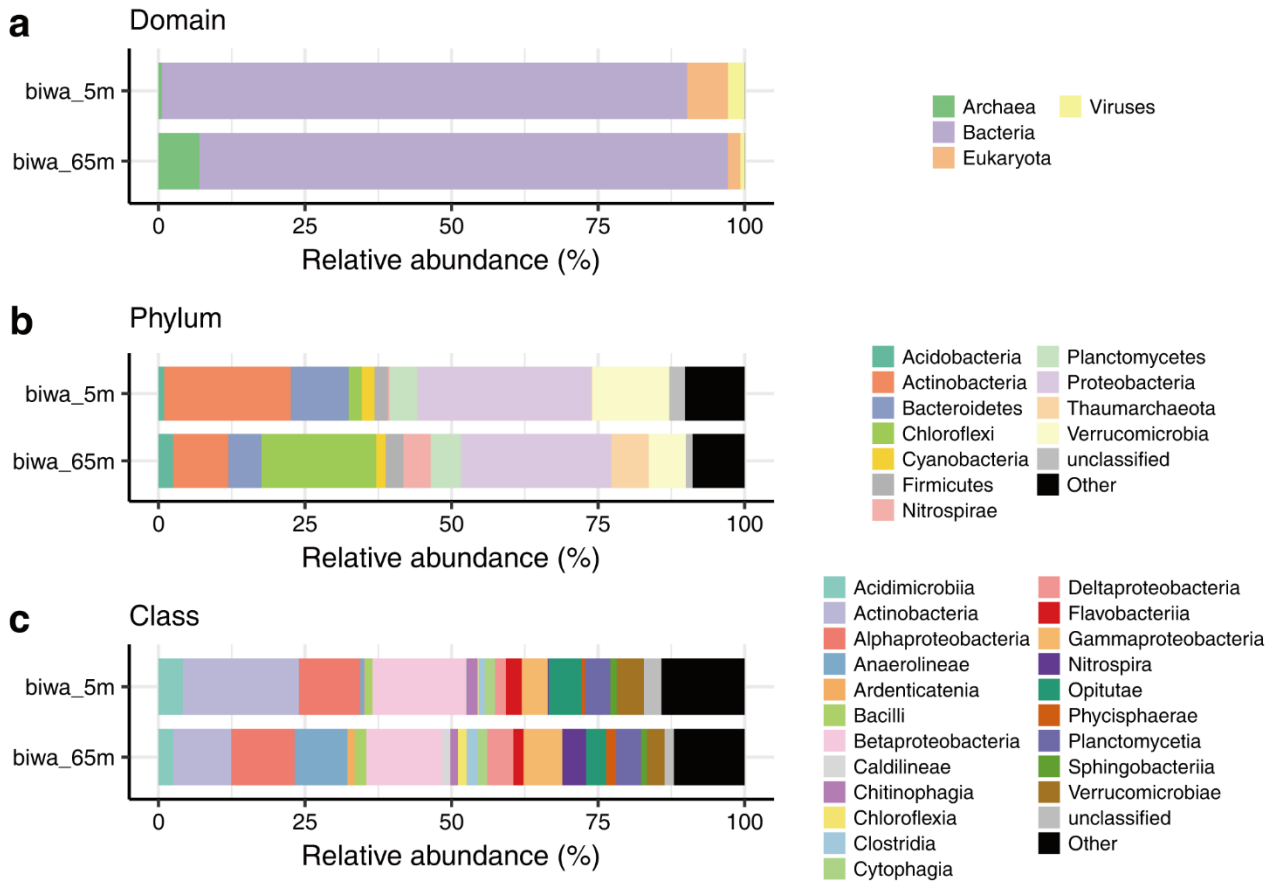

590

591 **Figure 1.** Phylogenetic distribution of CCS reads. Estimated relative abundances at the (a) domain, (b)

592 phylum, and (c) class levels are shown. Eukaryotic and viral reads are ignored, and groups with <1%

593 abundance are grouped as 'Others' in b and c.

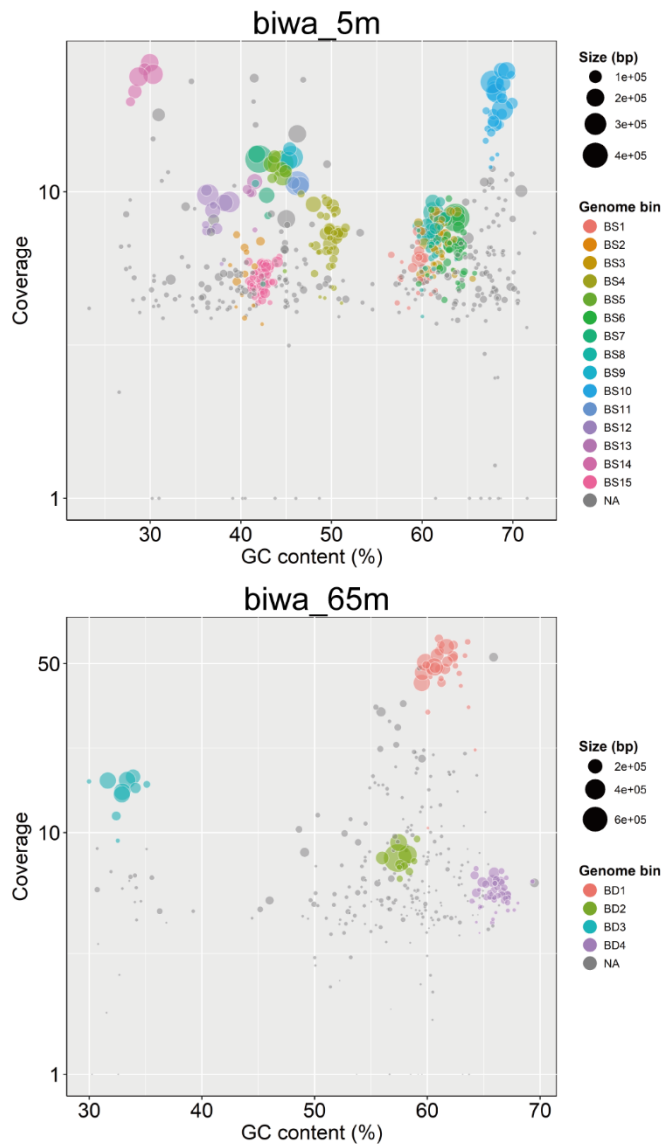

594

595 **Figure 2.** Genome binning of the assembled contigs. Each circle represents a contig, where the color and size  
596 represent its assigned bin and total sequence length, respectively. Contigs not assigned to any bin are indicated  
597 in gray (named 'NA'). The x-axis and y-axis represent GC% and genome coverage, respectively.

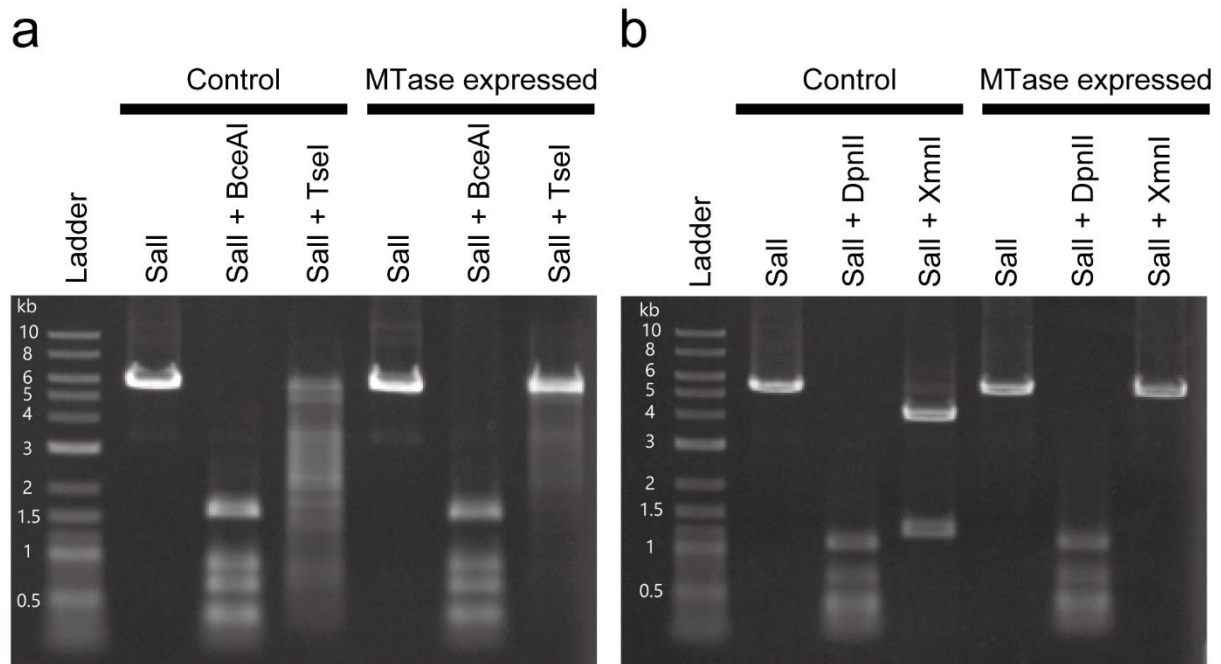

598

599 **Figure 3.** REase digestion assays. **a** Assay of the EMGBS3\_12600 gene (and EMGBD1\_09320, which has  
600 the same amino-acid sequence). BceAI and TseI were used, where the plasmid contained 12 (ACGGC) and 21  
601 (GCWGC) target sites, respectively. Plasmid DNAs were linearized using Sall before the assay. An NEB  
602 2-log DNA ladder was employed as a size marker. **b** Assay of the EMGBS15\_03820 gene. DpnII and XmnI  
603 were used, where the plasmid contained 27 (GATC) and two (GAANNNTTC) target sites, respectively.

604



605 **Tables**

606 **Table 1.** Statistics of SMRT sequencing and CCS-read analysis.

| Sample                | biwa_5m       | biwa_65m      |
|-----------------------|---------------|---------------|
| Sequenced reads       | 850,494       | 688,436       |
| Total base pairs (bp) | 9,570,723,004 | 6,419,717,083 |
| CCS reads             | 168,599       | 117,802       |
| Read length (bp)      | 4,474 ± 931   | 4,394 ± 587   |
| Total base (bp)       | 754,416,328   | 517,663,806   |
| 16S rRNA              | 170           | 106           |
| Length (bp)           | 1,491 ± 64    | 1,468 ± 104   |

607

608 **Table 2.** Statistics for genome bins.

| Genome bin | Lineage                                                                                                                                 | Estimated genome size (Mb) | Contigs | N50 (bp)  | GC content (%) | Completeness (%) | Contamination (%) | 16S rRNA | CDSs  | Coverage | Methylated motifs | MTases | Prophage |
|------------|-----------------------------------------------------------------------------------------------------------------------------------------|----------------------------|---------|-----------|----------------|------------------|-------------------|----------|-------|----------|-------------------|--------|----------|
| BS1        | Bacteria; Chloroflexi <sup>1</sup>                                                                                                      | 2.24                       | 21      | 64,528    | 59.5           | 30.6             | 0.0               | 0        | 751   | 5.79     | 3                 | 0      | 0        |
| BS2        | Bacteria; Actinobacteria <sup>1</sup>                                                                                                   | 1.57                       | 13      | 28,617    | 40.6           | 16.9             | 0.0               | 0        | 363   | 5.13     | 0                 | 0      | 1        |
| BS3        | Bacteria; Chloroflexi; Anaerolineae; Anaerolineales; Anaerolineaceae; uncultured; uncultured Crater Lake bacterium CL500-11             | 3.35                       | 36      | 58,996    | 61.8           | 49.1             | 0.0               | 1        | 1,646 | 6.91     | 3                 | 3      | 0        |
| BS4        | Bacteria; Actinobacteria; Acidimicrobiia; Acidimicrobiales; Acidimicrobiaceae; CL500-29 marine group                                    | 2.31                       | 40      | 61,750    | 49.8           | 76.8             | 1.3               | 1        | 2,066 | 6.67     | 0                 | 0      | 2        |
| BS5        | Bacteria; Actinobacteria; Actinobacteria; Frankiales; Sporichthyaceae; hgcI clade; uncultured <i>Clavibacter</i> sp.                    | 1.51                       | 8       | 190,417   | 44.2           | 71.6             | 0.0               | 1        | 1,209 | 10.02    | 0                 | 0      | 2        |
| BS6        | Bacteria; Verrucomicrobia; Opitutae; Opitutae vadinHA64; uncultured bacterium                                                           | 2.27                       | 37      | 100,045   | 63.4           | 89.2             | 0.7               | 1        | 1,889 | 6.85     | 0                 | 1      | 1        |
| BS7        | Bacteria; Actinobacteria; Actinobacteria; Frankiales; Sporichthyaceae; hgcI clade; uncultured <i>Candidatus</i> Planktophila sp.        | 1.49                       | 6       | 470,028   | 42.1           | 58.4             | 0.6               | 1        | 948   | 9.26     | 0                 | 0      | 0        |
| BS8        | Bacteria; Verrucomicrobia <sup>2</sup>                                                                                                  | 2.71                       | 34      | 102,020   | 61.2           | 82.5             | 2.0               | 0        | 2,121 | 7.34     | 1                 | 1      | 0        |
| BS9        | Bacteria; Actinobacteria <sup>2</sup>                                                                                                   | 1.65                       | 3       | 315,861   | 45.5           | 37.6             | 0.0               | 0        | 677   | 12.09    | 0                 | 0      | 3        |
| BS10       | Bacteria; Verrucomicrobia; Opitutae; Opitutae vadinHA64; uncultured bacterium                                                           | 2.55                       | 24      | 1,672,582 | 68.4           | 95.9             | 2.7               | 1        | 2,165 | 17.93    | 1                 | 1      | 2        |
| BS11       | Bacteria; Actinobacteria; Actinobacteria; Frankiales; Sporichthyaceae; hgcI clade; uncultured actinobacterium                           | 1.03                       | 3       | 365,154   | 46.3           | 62.1             | 0.0               | 1        | 675   | 10.28    | 0                 | 0      | 1        |
| BS12       | Bacteria; Proteobacteria; Betaproteobacteria; Methylophilales; Methylophilaceae; <i>Candidatus</i> Methylopumilus; uncultured bacterium | 1.40                       | 10      | 169,468   | 37.3           | 80.7             | 0.4               | 1        | 1,289 | 8.37     | 3                 | 0      | 1        |
| BS13       | Bacteria; Actinobacteria; Actinobacteria <sup>1</sup>                                                                                   | 1.49                       | 5       | 47,968    | 41.3           | 19.0             | 0.0               | 0        | 351   | 7.56     | 0                 | 0      | 0        |
| BS14       | Proteobacteria; Alphaproteobacteria; Pelagibacterales <sup>1</sup>                                                                      | 1.02                       | 6       | 222,441   | 29.4           | 88.6             | 0.0               | 0        | 1,075 | 20.45    | 1                 | 1      | 1        |
| BS15       | Bacteria; Bacteroidetes; Sphingobacteriia; Sphingobacteriales; Chitinophagaceae; Filimonas; uncultured bacterium                        | 4.08                       | 44      | 45,979    | 42.4           | 43.1             | 0.1               | 1        | 1,908 | 5.57     | 11                | 6      | 0        |
| BD1        | Bacteria; Chloroflexi <sup>1</sup>                                                                                                      | 2.89                       | 30      | 157,947   | 60.9           | 90.9             | 0.9               | 0        | 2,429 | 45.74    | 3                 | 3      | 0        |
| BD2        | Bacteria; Nitrospirae <sup>1</sup>                                                                                                      | 1.92                       | 11      | 313,929   | 57.6           | 93.9             | 0.9               | 0        | 1,890 | 8.01     | 1                 | 2      | 2        |
| BD3        | Archaea; Thaumarchaeota; Marine Group I; Unknown Order; Nitrosoarchaeum                                                                 | 1.48                       | 10      | 250,506   | 33.0           | 98.5             | 1.9               | 1        | 1,869 | 13.93    | 2                 | 2      | 0        |
| BD4        | Bacteria; Verrucomicrobia <sup>2</sup>                                                                                                  | 2.09                       | 49      | 46,663    | 65.9           | 81.5             | 0.7               | 0        | 1,705 | 5.98     | 0                 | 0      | 0        |

<sup>1</sup> Estimated using CAT

<sup>2</sup> Estimated using Kaiju

609

610

611 **Table 3.** Detected methylated motifs.

| Genome bin | Detected methylated motif | Modification Type | Motif in REBASE | Number of methylated sites | Number of motif sequences | Methylation ratio (%) | Mean modification QV | Mean motif coverage |
|------------|---------------------------|-------------------|-----------------|----------------------------|---------------------------|-----------------------|----------------------|---------------------|
| BS1        | <u>G</u> ANTC             | m6A               | Yes             | 1,813                      | 2,070                     | 87.6%                 | 58.0                 | 35.2                |
|            | TTAA <u>A</u>             | m6A               | Yes             | 1,264                      | 1,522                     | 83.0%                 | 55.5                 | 34.1                |
|            | GC <u>W</u> GC            | m4C               | Yes             | 3,026                      | 15,948                    | 19.0%                 | 38.4                 | 40.6                |
| BS3        | <u>G</u> ANTC             | m6A               | Yes             | 3,724                      | 4,014                     | 92.8%                 | 66.1                 | 41.3                |
|            | TTAA <u>A</u>             | m6A               | Yes             | 3,036                      | 3,338                     | 91.0%                 | 62.4                 | 40.4                |
|            | GC <u>W</u> GC            | m4C               | Yes             | 13,821                     | 54,026                    | 25.6%                 | 39.5                 | 46.4                |
| BS8        | <u>A</u> GGNNNNRRTTT      | m6A               | No              | 80                         | 276                       | 29.0%                 | 39.6                 | 65.8                |
| BS10       | ACG <u>A</u> G            | m6A               | No              | 1,986                      | 7,185                     | 27.6%                 | 45.0                 | 171.4               |
| BS12       | GMAG <u>C</u> TKC         | m4C               | No              | 169                        | 220                       | 76.8%                 | 50.9                 | 83.5                |
|            | HCAG <u>C</u> TKC         | m4C               | No              | 124                        | 293                       | 42.3%                 | 46.8                 | 79.0                |
|            | BGMAG <u>C</u> TGD        | m4C               | No              | 78                         | 185                       | 42.2%                 | 46.3                 | 76.3                |
| BS14       | <u>G</u> ANTC             | m6A               | Yes             | 2,856                      | 2,880                     | 99.2%                 | 190.6                | 166.9               |
| BS15       | <u>G</u> AANNNNTTC        | m6A               | Yes             | 1,309                      | 1,472                     | 88.9%                 | 55.6                 | 30.9                |
|            | <u>A</u> GCNNNNNNCAT      | m6A               | No              | 642                        | 726                       | 88.4%                 | 56.0                 | 29.4                |
|            | <u>A</u> TGNNNNNNNGCT     | m6A               | No              | 619                        | 726                       | 85.3%                 | 52.0                 | 29.8                |
|            | <u>A</u> GCNNNNNNGTG      | m6A               | No              | 311                        | 349                       | 89.1%                 | 56.9                 | 30.4                |
|            | <u>C</u> ACNNNNNNNGCT     | m6A               | No              | 293                        | 349                       | 84.0%                 | 53.3                 | 30.9                |
|            | CA <u>A</u> NNNNNNNNCTTG  | m6A               | No              | 205                        | 256                       | 80.1%                 | 49.4                 | 29.1                |
|            | CA <u>A</u> GNNNNNNNDTTG  | m6A               | No              | 164                        | 214                       | 76.6%                 | 48.7                 | 28.7                |
|            | TT <u>A</u> GNNNNNNCCT    | m6A               | No              | 87                         | 99                        | 87.9%                 | 51.3                 | 29.8                |
|            | <u>A</u> GGNNNNNNCTAA     | m6A               | No              | 77                         | 99                        | 77.8%                 | 49.4                 | 29.7                |
|            | GYT <u>A</u> NNNNNNNTTRG  | m6A               | No              | 76                         | 89                        | 85.4%                 | 56.0                 | 31.3                |
|            | CYA <u>A</u> NNNNNNNTAVCH | m6A               | No              | 59                         | 127                       | 46.5%                 | 53.5                 | 32.6                |
| BD1        | GC <u>W</u> GC            | m4C               | Yes             | 72,730                     | 77,932                    | 93.3%                 | 140.2                | 297.3               |
|            | <u>G</u> ANTC             | m6A               | Yes             | 6,754                      | 6,844                     | 98.7%                 | 346.3                | 281.7               |
|            | TTAA <u>A</u>             | m6A               | Yes             | 5,475                      | 5,564                     | 98.4%                 | 325.3                | 270.9               |
| BD2        | TANGG <u>A</u> B          | m6A               | No              | 1,276                      | 1,367                     | 93.3%                 | 64.4                 | 48.5                |
| BD3        | <u>G</u> ATC              | m6A               | Yes             | 9,446                      | 9,618                     | 98.2%                 | 122.1                | 93.7                |
|            | AG <u>C</u> T             | m4C               | Yes             | 5,974                      | 6,224                     | 96.0%                 | 84.0                 | 92.1                |

612 R= G/A, Y= T/C, M= A/C, K= G/T, S= G/C, W= A/T, H= A/C/T, B= G/T/C, V= G/C/A, D= G/A/T, N= G/A/T/C

613

614 **Table 4.** Detected MTases, REases, and specificity subunit genes.

| Genome bin    | CDS ID        | Bioinformatic prediction |                           |                        |                             |                   |         | Experimental verification |                             |
|---------------|---------------|--------------------------|---------------------------|------------------------|-----------------------------|-------------------|---------|---------------------------|-----------------------------|
|               |               | Gene type <sup>1</sup>   | Top-hit protein in REBASE | Identity (%)           | Predicted recognition motif | Modification type | RM type | MTase name                | Confirmed recognition motif |
| BS3           | EMGBS3_04270  | M                        | M.SstE37II                | 58.9                   | G <u>A</u> NTC              | m6A               | II      | M.AspBS3I                 | GCWGC                       |
|               | EMGBS3_09240  | M                        | M.Sth20745I               | 71.4                   | TTAA <u>A</u>               | m6A               | II      |                           |                             |
|               | EMGBS3_12600  | M                        | M1.BceSIII                | 22.9                   | AC <u>G</u> GC              | m4C               | II      |                           |                             |
| BS6           | EMGBS6_08960  | M                        | M.SinI                    | 57.0                   | GGW <u>C</u> C              | m5C               | II      |                           |                             |
| BS8           | EMGBS8_10720  | R                        | DvuI                      | 36.3                   | ?                           | -                 | I       |                           |                             |
|               | EMGBS8_10740  | S                        | S.PveNS15I                | 32.4                   | ?                           | -                 | I       |                           |                             |
|               | EMGBS8_10750  | M                        | M.RbaNRL2II               | 55.6                   | ACG <u>A</u> NNNNNNNGRTC    | m6A               | I       |                           |                             |
| BS10          | EMGBS10_10070 | RM                       | CjeFIII                   | 23.7                   | GCA <u>A</u> GG             | m6A               | II      | M.OspBS10I                | ACG <u>A</u> G              |
| BS14          | EMGBS14_10020 | M                        | M.Bsp460I                 | 56.7                   | G <u>A</u> NTC              | m6A               | II      |                           |                             |
| BS15          | EMGBS15_02830 | M                        | M.Bli37I                  | 56.6                   | G <u>A</u> YNNNNNNRTTC      | m6A               | I       | M.FspBS15I                | G <u>A</u> ANNNTTC          |
|               | EMGBS15_02840 | M                        | M.EcoNIH1III              | 59.2                   | G <u>A</u> TGNNNNNNTAC      | m6A               | I       |                           |                             |
|               | EMGBS15_02870 | S                        | S.PveNS15I                | 47.2                   | ?                           | -                 | I       |                           |                             |
|               | EMGBS15_02930 | R                        | DvuI                      | 38.4                   | ?                           | -                 | I       |                           |                             |
|               | EMGBS15_03820 | M                        | M.EcoGI                   | 25.8                   | non-specific                | m6A               | II      |                           |                             |
|               | EMGBS15_03830 | R                        | XmnI                      | 34.0                   | GAANNNTTC                   | -                 | II      |                           |                             |
|               | EMGBS15_04560 | R                        | GmeII                     | 33.8                   | TCCAGG                      | -                 | III     |                           |                             |
|               | EMGBS15_04600 | M                        | M.FpsJII                  | 53.4                   | CGC <u>A</u> G              | m6A               | III     |                           |                             |
|               | EMGBS15_05670 | M                        | M.FnuDI                   | 59.8                   | GGCC <sup>2</sup>           | m4C               | II      |                           |                             |
|               | EMGBS15_05690 | R                        | BhaII                     | 45.6                   | GGCC                        | -                 | II      |                           |                             |
| EMGBS15_12460 | M             | M.Mva1261III             | 37.1                      | CT <u>A</u> NNNNNNRTTC | m6A                         | I                 |         |                           |                             |
| BD1           | EMGBD1_08400  | M                        | M.Sth20745I               | 71.0                   | TTAA <u>A</u>               | m6A               | II      | M.AspBS3I                 | GCWGC                       |
|               | EMGBD1_09320  | M                        | M1.BceSIII                | 22.9                   | A <u>C</u> GGC              | m4C               | II      |                           |                             |
|               | EMGBD1_19510  | M                        | M.SstE37II                | 58.9                   | G <u>A</u> NTC              | m6A               | II      |                           |                             |
| BD2           | EMGBD2_08760  | M                        | M.HgiDII                  | 55.0                   | GTCGAC <sup>1</sup>         | m5C               | II      | M.NspBD2I                 | TAHGG <u>A</u> B            |
|               | EMGBD2_08790  | RM                       | AquIV                     | 28.5                   | GRGGA <u>A</u> G            | m6A               | II      |                           |                             |
|               | EMGBD2_08800  | R                        | LpnPI                     | 56.3                   | CCDG                        | -                 | II      |                           |                             |
| BD3           | EMGBD3_00670  | M                        | M.Mma5219II               | 45.9                   | AG <u>C</u> T               | m4C               | II      |                           |                             |
|               | EMGBD3_01960  | M                        | M.AvaVI                   | 50.3                   | G <u>A</u> TC               | m6A               | II      |                           |                             |

<sup>1</sup> M: Methyltransferase, R: Restriction endonuclease, S: specificity subunit

<sup>2</sup> Modified base undetermined

615

616
